# Supplementary material
Source: HighWire-hosted journal article supplement (doi:10.1101/rna.079096.121)
Supplement: Supplemental_Information.docx [file Supplemental_Information.docx]

**Supporting Information**

**Plasticity and conditional essentiality of modification enzymes**

**for domain V of *Escherichia coli* 23S ribosomal RNA**

Josefine Liljeruhma, Margus Leppikb, Letian Baoa, Triin Truub, Maria Calvo-Noriegaa, Nicola S. Freyera, Aivar Liivb, Jinfan Wanga, Rubén Crespo Blancoa, Rya Erob, Jaanus Remmeb,1 and Anthony C. Forstera,1

aDepartment of Cell and Molecular Biology, Uppsala University, Husargatan 3, Box 596, Uppsala 75124, Sweden;

bDepartment of Molecular Biology, University of Tartu, 51010 Tartu, Estonia.

1To whom correspondence may be addressed. E-mail: [jaanus.remme@ut.ee](mailto:jaanus.remme@ut.ee) or [a.forster@icm.uu.se](mailto:a.forster@icm.uu.se)

**Contents**

**Fig. S1.** PCR analysis of *ΔrluC*/*ΔrlmE.*

**Fig. S2.** HPLC analysis of nucleosides from *ΔrluC/ΔrlmE*, *ΔCKLNMuE* and WT 50S subunits.

**Fig. S3.** Additional controls for *ΔrluC/ΔrlmE* growth assays in Fig. 2A-E.

**Fig. S4.** Ribosome sucrose gradients for *ΔrluC/ΔrlmE* and associated controls.

**Fig. S5.** HPLC analysis of peptidyl transferase "fragment reactions" with *ΔCKLNMuE* and WT 50S subunits.

**Fig. S6.** Translational frameshifting *in vivo* of *ΔCKLNMuE* and WT at 20ºC.

**Tables S1 and S2.** Source data for frameshifting Figs. 4 and S6 (in separate xlsx file).


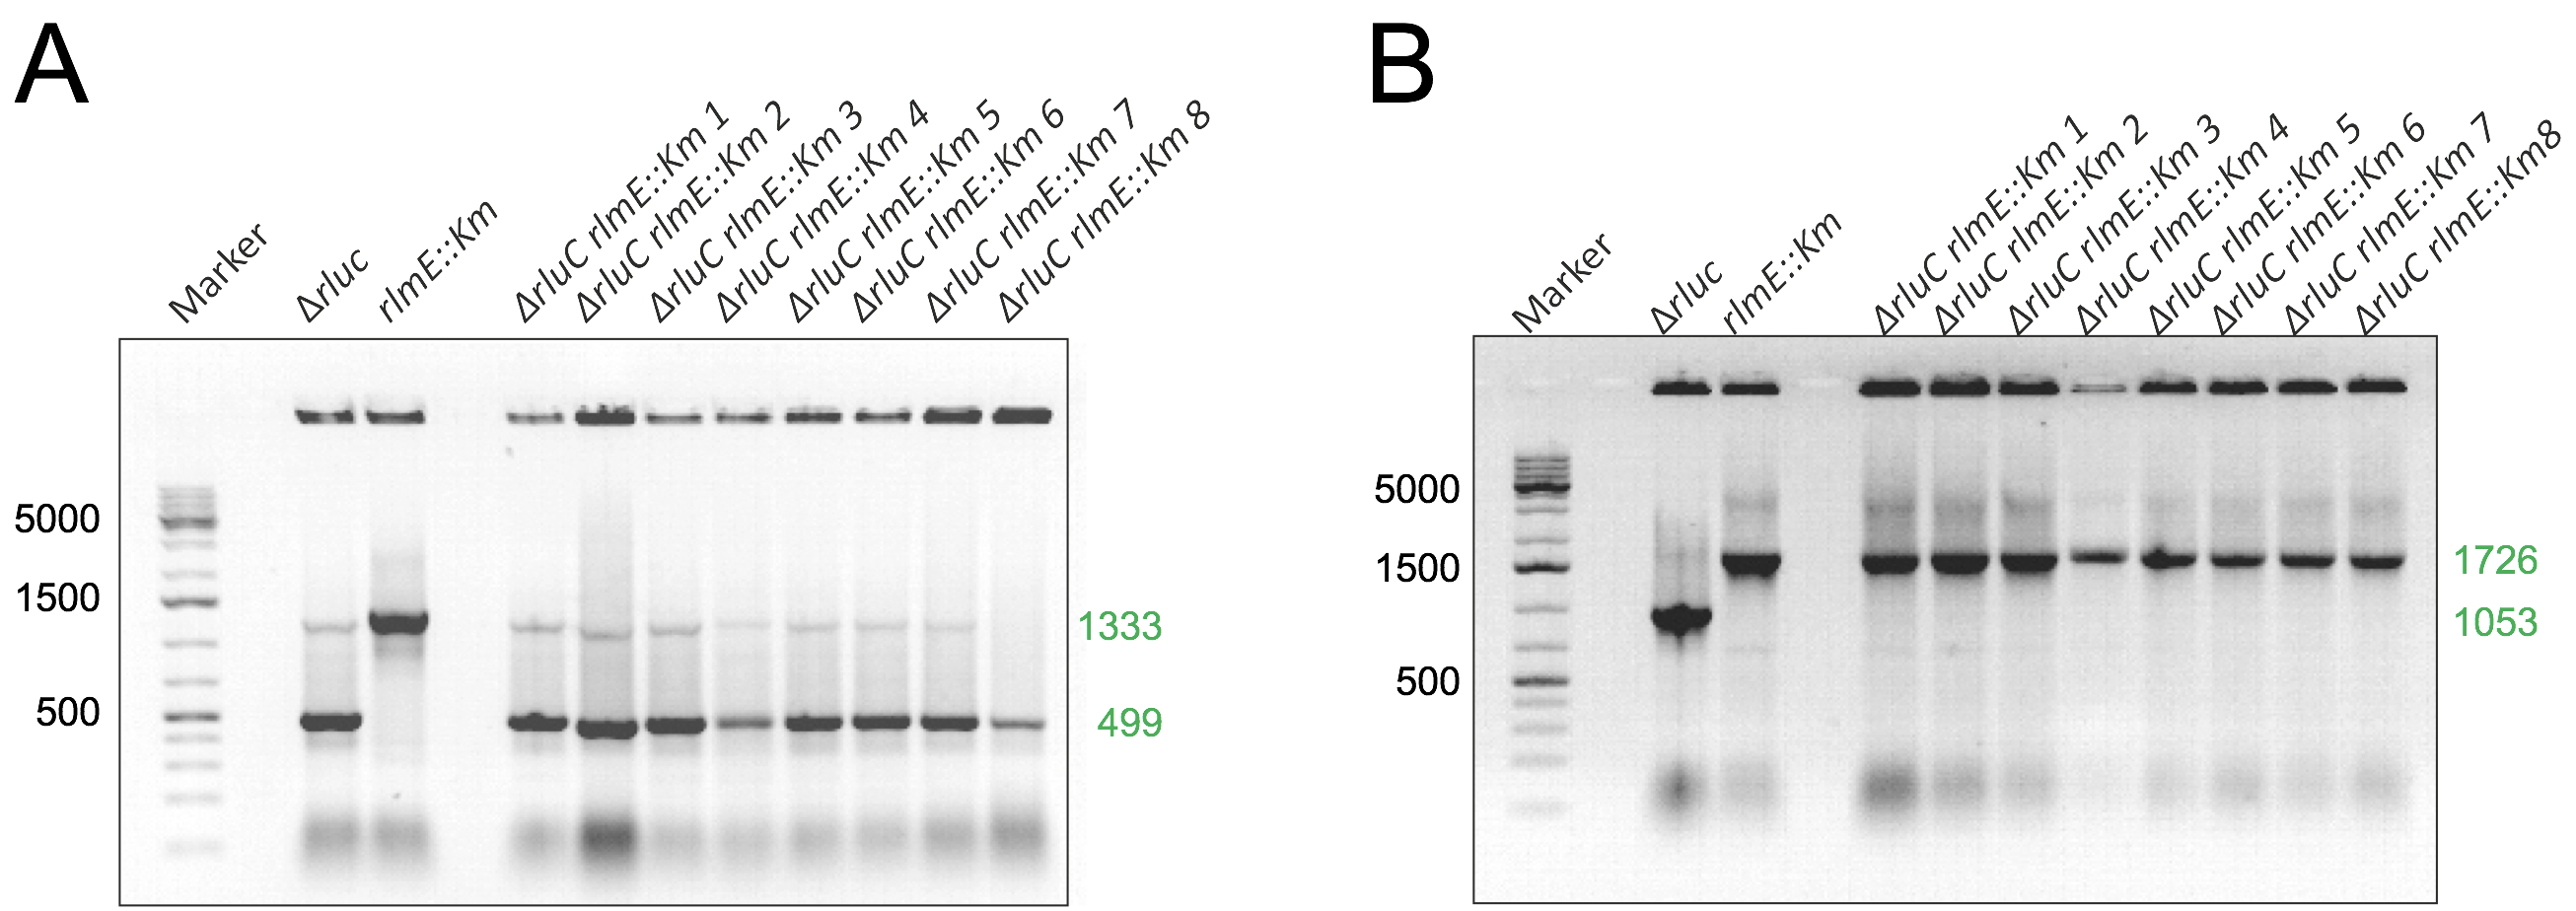


**Fig. S1.** **PCR analysis of *ΔrluC*/*ΔrlmE* strains.** PCRs of eight *ΔrluC*/*ΔrlmE* colonies with primer pairs that would amplify the gene *rluC* **(A)** or *rlmE* **(B)**. The sizes of the darkest marker bands are indicated (GeneRuler 1 kb plus DNA ladder, ThermoFisher Scientific). All colonies 1-8 analysed here (right lanes) gave bands at the expected sizes (indicated in green). **(A)** Amplification from *rluC* would give 1333 bp whereas its deletion and subsequent removal of the kanamycin cassette would yield 499 bp. **(B)** Amplification from *rlmE* would give 1053 bp whereas the kanamycin cassette replacing the gene would yield 1726 bp.


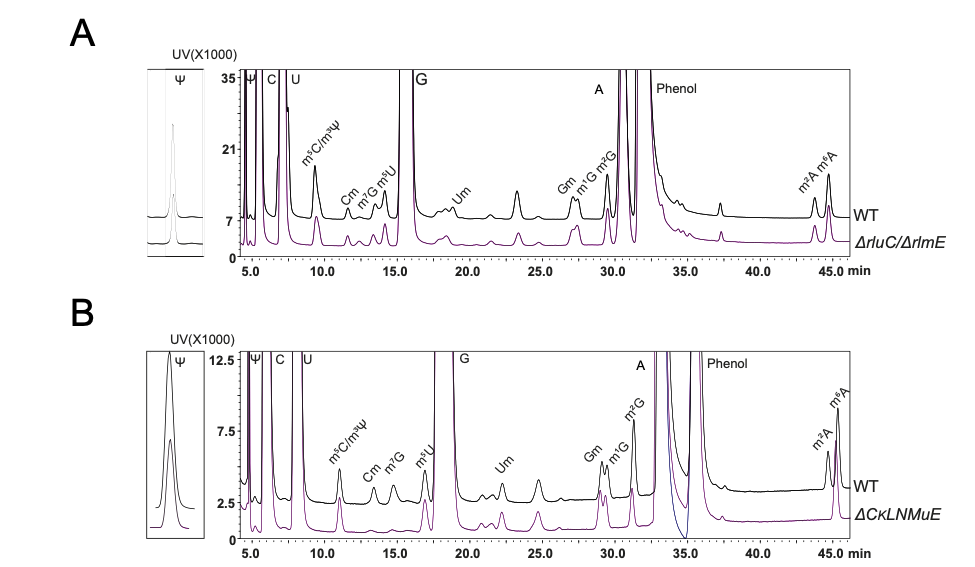


**Fig. S2.** **HPLC analysis of nucleosides from *ΔrluC/ΔrlmE*, *ΔCKLNMuE* and WT 50S subunits.** 50S ribosomal subunits were purified from mature 70S ribosomes, 23S and 5S rRNAs were extracted, the rRNAs were digested with nuclease P1, and the digests were treated with alkaline phosphatase. Products were separated by HPLC and identified based on mobilities (see Materials and Methods). Representative comparisons with WT are shown for *ΔrluC/ΔrlmE* **(A)**, and *ΔCKLNMuE* **(B)**. Quantifications of HPLC peak areas are included in Fig. 1B.


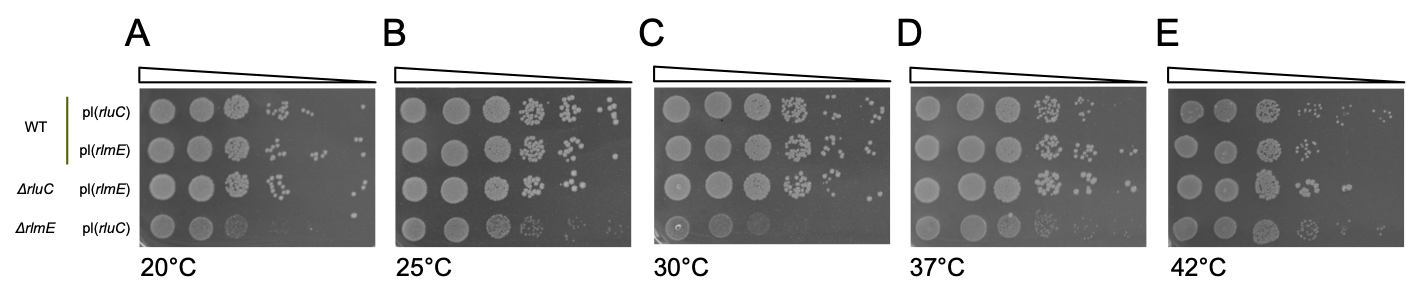


**Fig. S3.** **Additional controls for *ΔrluC/ΔrlmE* growth assays in Fig. 2A-E.** Spot growth assays on chloramphenicol agar plates using the “rescue” plasmids (pl) indicated with progressive dilutions of cells (see Materials and Methods). This shows a lack of phenotype due to the rescue plasmids *per se*.

**
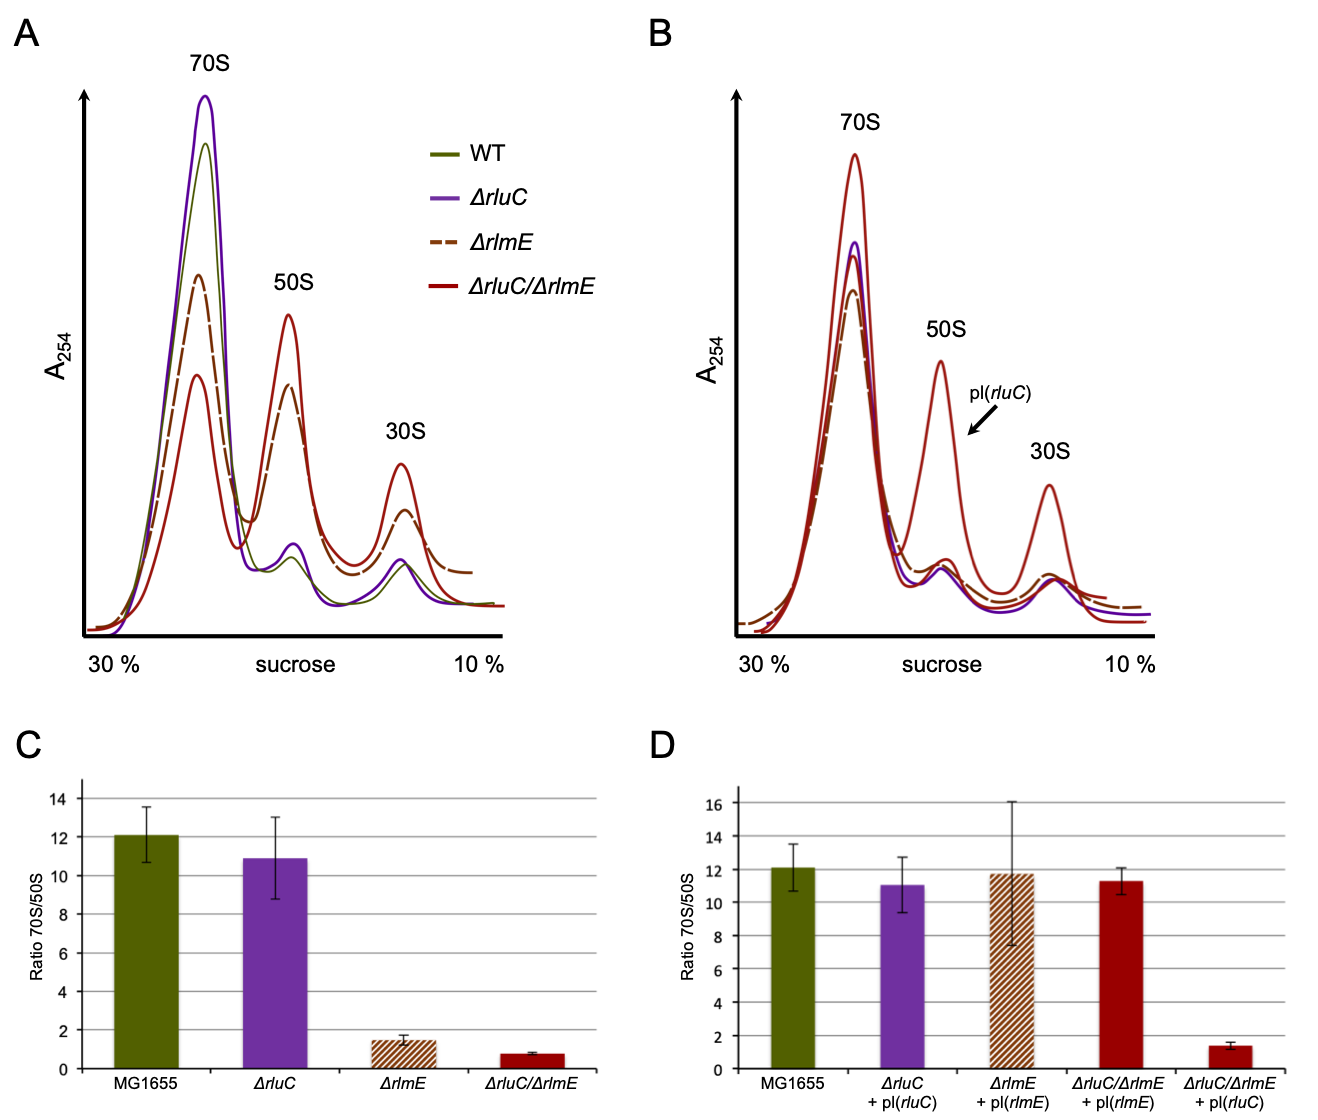
**

**Fig. S4.** **Ribosome sucrose gradients for *ΔrluC/ΔrlmE* and associated controls.** Ribosome sucrose gradients ofall **(A)** unrescuedand **(B)** plasmid-rescuedstrains exactly as indicated inFig. 2F performed under the same conditions. Some of the gradients from Fig. 2H and I are shown again for comparison.Sedimentation is from right to left. **(C)** and **(D)** are plots of the ratios of the 70S/50S peak areas with standard errors from at least two biological replicates of the respective gradients shown above.

**
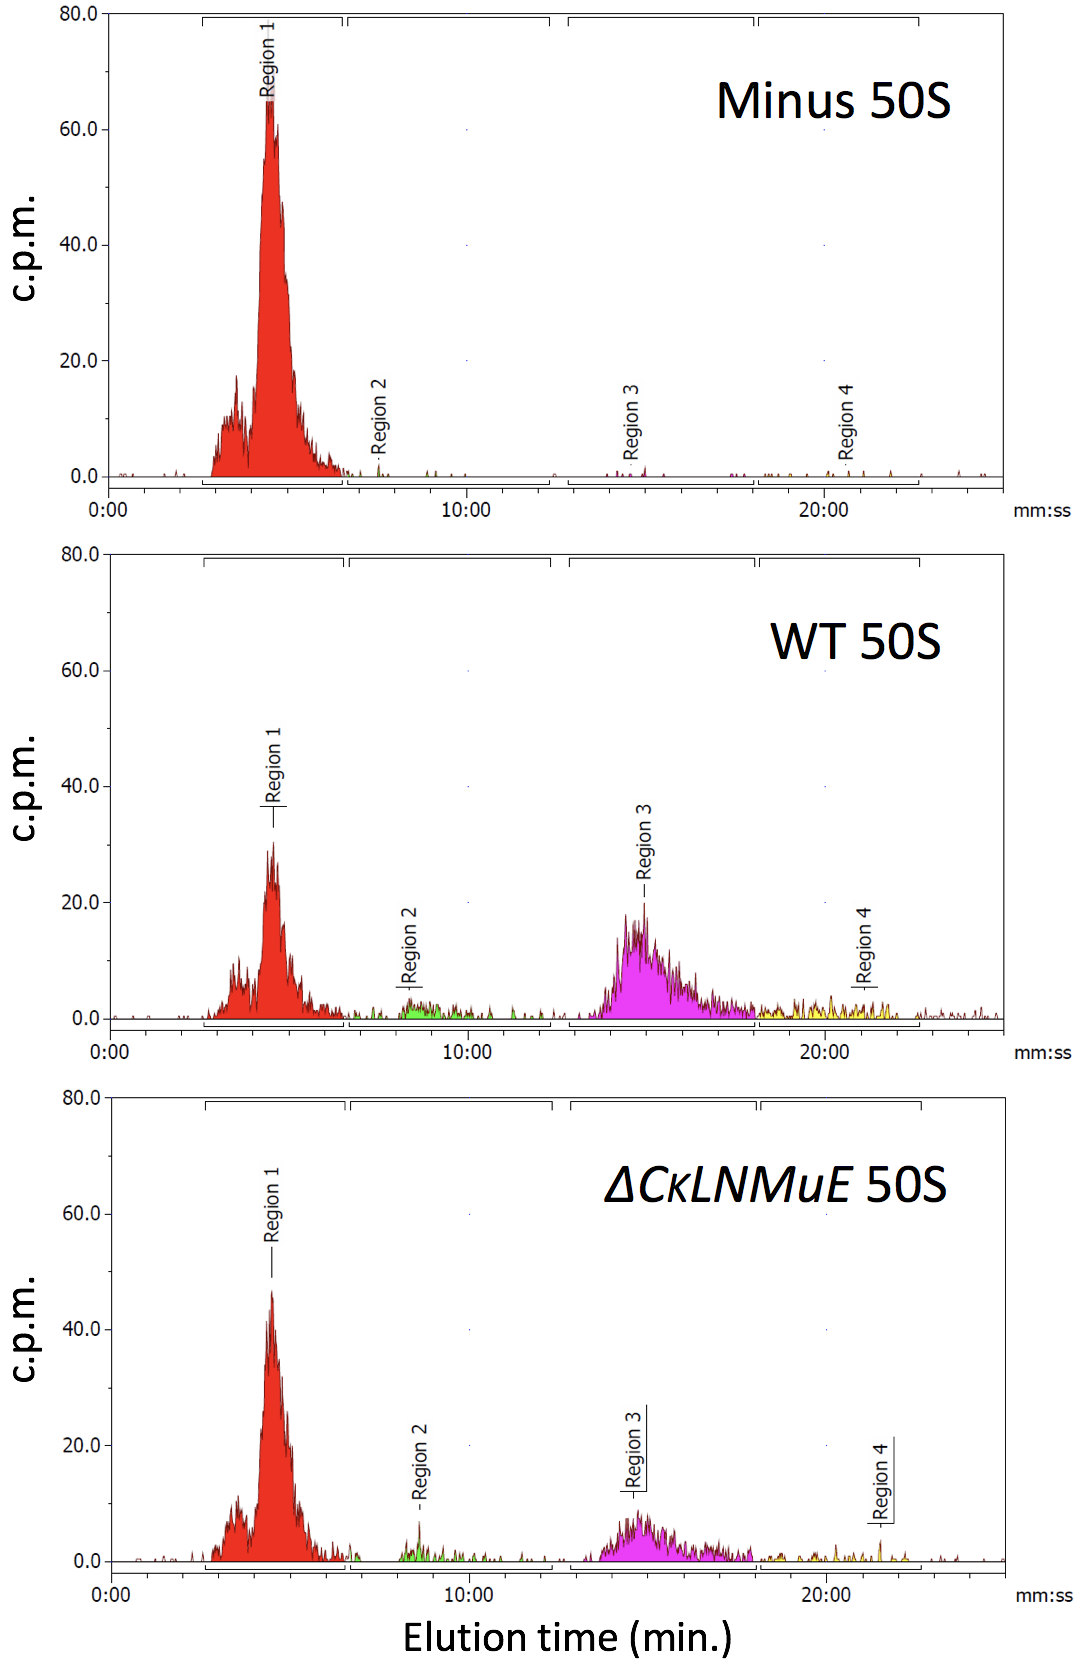
**

**Fig. S5.** **HPLC analysis of peptidyl transferase "fragment reactions" with *ΔCKLNMuE* and WT 50S subunits.** The major (right) red peak corresponds to f[3H]Met while the purple peak corresponds to f[3H]Met-puromycin product (see Materials and Methods).

**
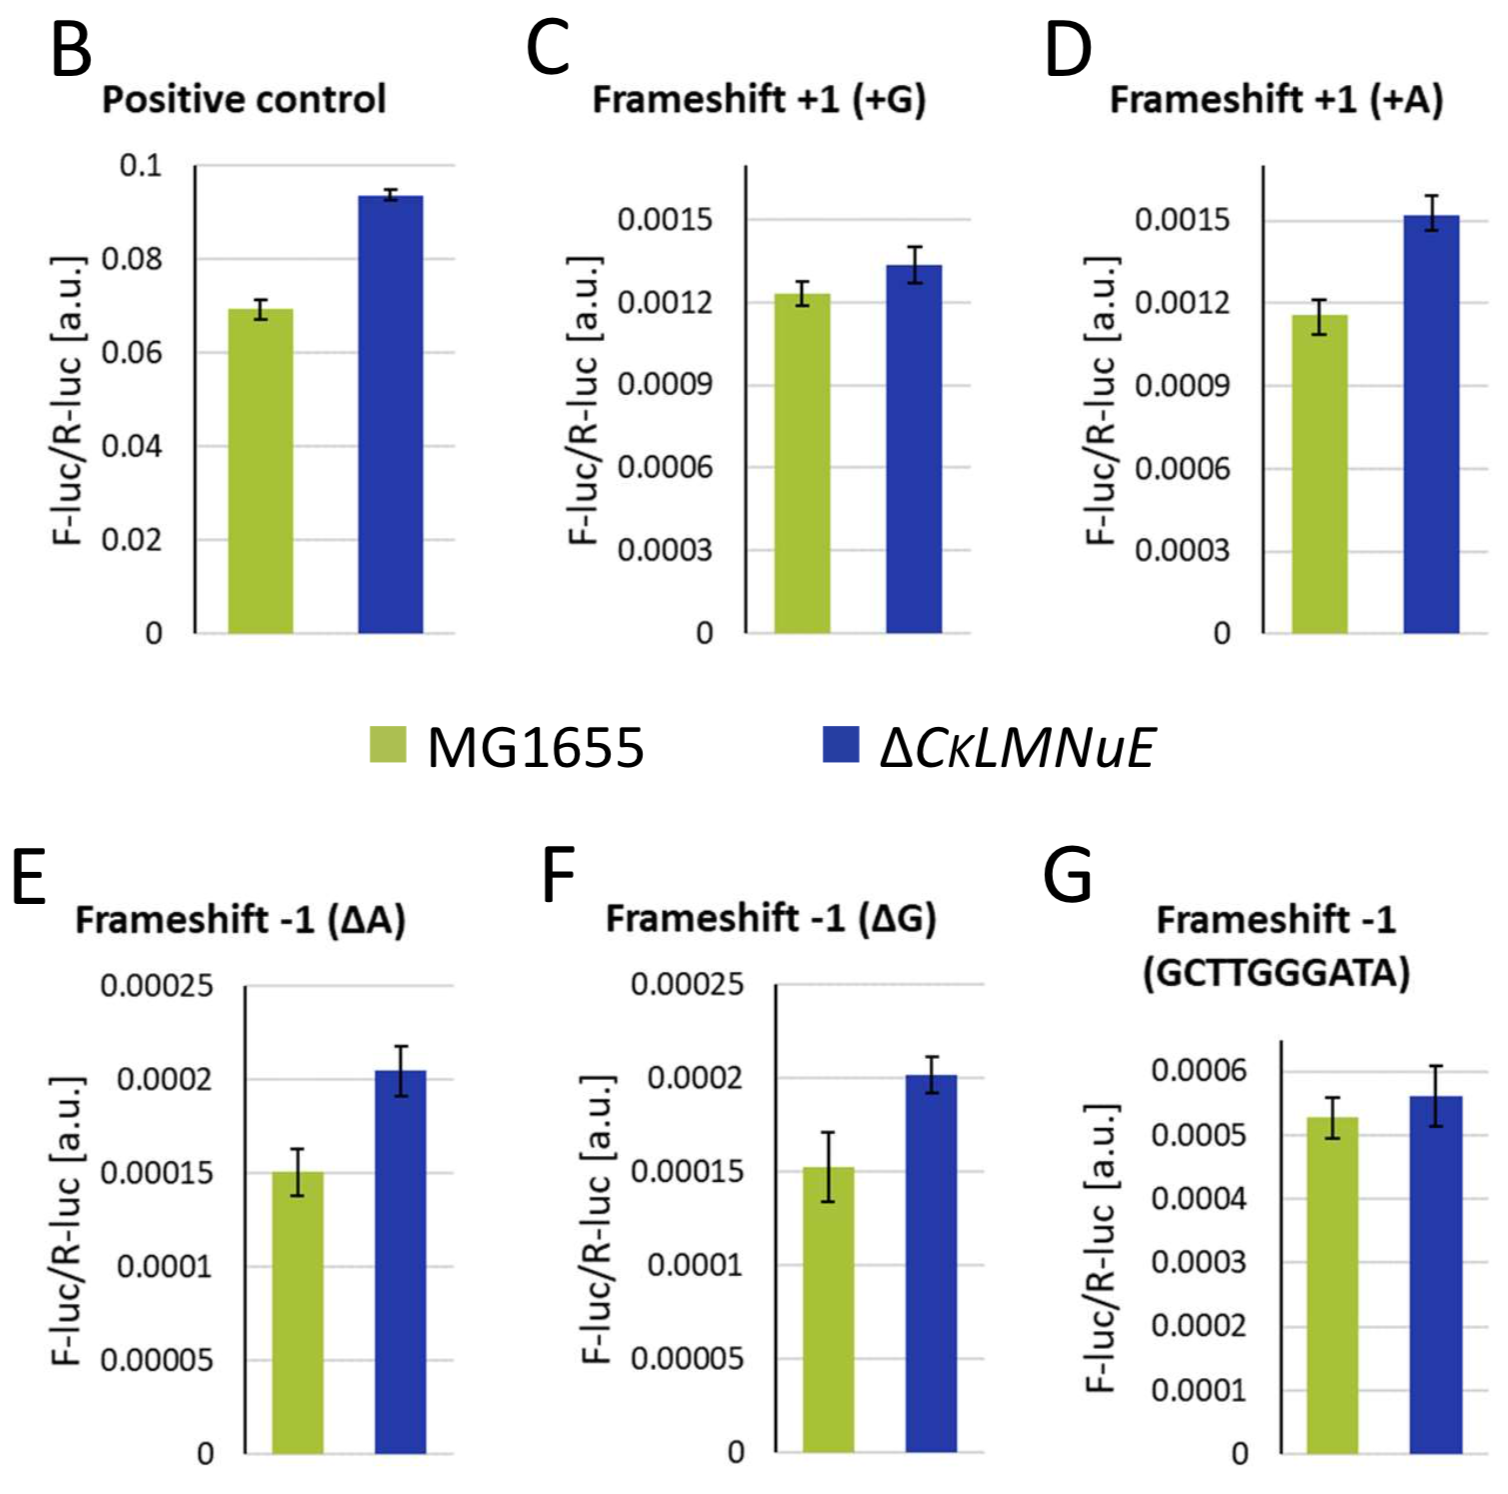
**

**Fig. S6. Translational frameshifting *in vivo* of *ΔCKLNMuE* and WT at 20ºC.** B-G (there is no A) correspond to plasmids used in Fig. 4B-G and assays were performed identically (see Materials and Methods) except that growth was at 20ºC and induction was for 7 h. P < 0.05 for B, D, E and F.

----
