# Supplementary material
Source: HighWire-hosted journal article supplement (doi:10.1101/rna.079096.121)
Supplement: Supplemental_TableS1_andS2.xlsx [file Supplemental_TableS1_andS2.xlsx]

## Sheet: Table S1-source data for Fig 4
	Blanks without plasmid					Measurements (with blank subtracted)
Strain grown at 37ºC	Firefly luciferase	Renilla luciferase		Strain	Plasmid	Firefly luciferase	Renilla luciferase	Fluc/Rluc	Average
MG1655 strain	6000	5000		MG1655 strain	Negative control	923167	5946368000	0.000155249	0.000193344
	2000	3000				1.07317e+06	5640058000	0.000190276
	0	1000				1.26517e+06	7836066000	0.000161454
	1000	1000				1.14117e+06	4688236000	0.000243411
	1000	1000				1.18717e+06	6627350000	0.000179131
	1000	1000				1.50817e+06	6541866000	0.000230541
Average	1833.33	2000			Frameshift -1 (ΔA)	1.21232e+07	36015074000	0.000336614	0.000302664
ΔCLMNuE strain	1000	7000				1.35042e+07	38924606000	0.000346931
	1000	5000				1.47662e+07	40069362000	0.000368515
	1000	8000				1.10642e+07	39685522000	0.000278796
	1000	6000				8.20617e+06	40047654000	0.00020491
	1000	3000				1.06302e+07	37935170000	0.000280219
	17000	60000			Frameshift +1 (+G)	9.72612e+07	37856498000	0.00256921	0.00214687
Average	3666.67	14833.3				7.74352e+07	37598994000	0.0020595
ΔRlmE strain	18000	22000				8.32912e+07	37549818000	0.00221815
	28000	91000				1.04052e+08	42287314000	0.0024606
	17000	22000				8.41032e+07	43251710000	0.00194451
	9000	31000				6.10822e+07	37491082000	0.00162925
Average	18000	41500			Frameshift -1 (ΔG)	1.15022e+07	39545226000	0.000290861	0.000274818
ΔRluC/ΔRlmE strain	67000	236000				1.01052e+07	40769926000	0.000247858
	25000	43000				1.20672e+07	40767046000	0.000296003
	22000	45000				1.05402e+07	41573542000	0.000253531
	91000	313000				1.27382e+07	40406062000	0.000315254
	10000	20000				1.02122e+07	41613838000	0.000245403
	23000	87000			Frameshift +1 (+A)	1.12848e+08	45483710000	0.00248107	0.0024758
Average	39666.7	124000				8.97152e+07	45374218000	0.00197723
						1.13403e+08	41412518000	0.00273838
						1.39905e+08	50206586000	0.00278659
						1.10989e+08	45519190000	0.00243829
						1.10124e+08	45258114000	0.00243325
					Frameshift -1 (region)	4.63222e+07	45518002000	0.00101767	0.00101976
						4.83822e+07	46103106000	0.00104943
						6.03592e+07	54131102000	0.00111506
						3.50302e+07	42665418000	0.000821044
						5.19742e+07	48852834000	0.00106389
						4.67222e+07	44434258000	0.00105149
					Positive control	1.54364e+09	9289270000	0.166174	0.188217
						1.88825e+09	9097400000	0.20756
						1.37686e+09	7160476000	0.192287
						1.54772e+09	8736016000	0.177165
						1.537e+09	8575217000	0.179237
						1.83555e+09	8872629000	0.206878
				ΔCLMNuE strain	Negative control	928333	4.26869e+09	0.000217475	0.000257341
						1.47733e+06	4.91698e+09	0.000300455
						1.23033e+06	5.05342e+09	0.000243466
						1.36333e+06	6.08557e+09	0.000224027
						1.13033e+06	4.22543e+09	0.000267507
						1.74933e+06	6.00913e+09	0.000291113
					Frameshift -1 (ΔA)	6.31033e+06	2.07368e+10	0.000304306	0.00029788
						7.22433e+06	2.51645e+10	0.000287085
						6.23933e+06	1.92918e+10	0.000323419
						7.14733e+06	2.56119e+10	0.000279063
						7.00233e+06	2.77053e+10	0.000252743
						5.64333e+06	1.65657e+10	0.000340663
					Frameshift +1 (+G)	5.46363e+07	2.92873e+10	0.00186553	0.00185664
						6.15013e+07	3.41495e+10	0.00180094
						6.37223e+07	3.36808e+10	0.00189195
						5.18023e+07	2.78671e+10	0.00185891
						5.51073e+07	2.95766e+10	0.00186321
						5.99503e+07	3.22439e+10	0.00185927
					Frameshift -1 (ΔG)	7.81433e+06	2.60614e+10	0.000299844	0.000319257
						1.04603e+07	3.53048e+10	0.000296286
						8.76233e+06	2.37888e+10	0.000368338
						9.57933e+06	3.14999e+10	0.000304107
						9.66733e+06	3.07348e+10	0.000314541
						1.08633e+07	3.26788e+10	0.000332427
					Frameshift +1 (+A)	5.40473e+07	2.37881e+10	0.00227203	0.00211895
						5.32593e+07	2.76829e+10	0.00192391
						5.20623e+07	2.39154e+10	0.00217694
						5.51653e+07	2.45278e+10	0.0022491
						4.42013e+07	2.21928e+10	0.0019917
						6.61283e+07	3.14894e+10	0.00210002
					Frameshift -1 (region)	1.78533e+07	2.18461e+10	0.000817233	0.00081015
						2.52873e+07	3.03399e+10	0.000833467
						1.76213e+07	2.48573e+10	0.0007089
						1.95373e+07	2.38122e+10	0.000820477
						2.26763e+07	2.73781e+10	0.000828266
						2.46563e+07	2.89205e+10	0.000852556
					Positive control	1.43749e+09	7.14785e+09	0.201108	0.205015
						1.52192e+09	7.32193e+09	0.207858
						1.51474e+09	6.85407e+09	0.220999
						1.65194e+09	9.14567e+09	0.180625
						1.66024e+09	7.51673e+09	0.220872
						1.9196e+09	9.66436e+09	0.198627
				ΔRlmE strain	Negative control	803000	2760322500	0.000290908	0.000276855
						958000	2878520500	0.00033281
						819000	3085942500	0.000265397
						749000	2727243500	0.000274636
						491000	1995348500	0.000246072
						676000	2689934500	0.000251307
					Frameshift -1 (ΔA)	4011000	16531001500	0.000242635	0.000268164
						4098000	14524706500	0.00028214
						5945000	20393244500	0.000291518
						4546000	19513062500	0.000232972
						5176000	18307250500	0.00028273
						5363000	19361570500	0.000276992
					Frameshift +1 (+G)	23925000	17119694500	0.00139751	0.00161219
						24535000	17236266500	0.00142345
						19180000	13857142500	0.00138412
						21102000	10215155500	0.00206575
						30558000	17070924500	0.00179006
						24203000	15012002500	0.00161224
					Frameshift -1 (ΔG)	5098000	22842662500	0.000223179	0.000245543
						6366000	23085028500	0.000275763
						5295000	21974308500	0.000240963
						4905000	20830068500	0.000235477
						5731000	24334176500	0.000235512
						6293000	23985612500	0.000262366
					Frameshift +1 (+A)	29624000	20892240500	0.00141794	0.00159119
						43467000	21365698500	0.00203443
						31163000	16549757500	0.00188299
						29242000	17448488500	0.0016759
						30297000	24730914500	0.00122507
						31647000	24143026500	0.00131081
					Frameshift -1 (region)	13888000	15454837500	0.000898618	0.000728808
						11313000	17236908500	0.000656324
						13960000	20219480500	0.000690423
						13194000	18216322500	0.000724295
						10885000	19727544500	0.000551767
						14387000	16897600500	0.000851423
					Positive control	1011325000	3813753500	0.265178	0.218976
						877289000	3678432500	0.238495
						766111000	4226578500	0.18126
						560427000	2944545500	0.190327
						1245948000	5244865500	0.237556
						935810000	4654872500	0.201039
				ΔRluC/ΔRlmE strain	- control	261333	6311444000	4.14063e-05	6.38447e-05
						366333	6311444000	5.80427e-05
						466333	4905403000	9.50652e-05
						565333	7451240000	7.5871e-05
						249333	7288762000	3.42079e-05
						468333	5967913000	7.84752e-05
					Frameshift -1 (ΔA)	4.39233e+06	17226386000	0.000254977	0.000225132
						3.13133e+06	21212292000	0.000147619
						4.47133e+06	18443066000	0.00024244
						4.54433e+06	18375376000	0.000247306
						4.39733e+06	18846780000	0.00023332
					Frameshift +1 (+G)	3.10423e+07	21419588000	0.00144925	0.00141893
						3.27693e+07	22332384000	0.00146735
						3.18433e+07	15225766000	0.00209141
						3.05653e+07	24004152000	0.00127334
						2.47133e+07	21278430000	0.00116143
						2.60463e+07	24324334000	0.00107079
					Frameshift -1 (ΔG)	7.26833e+06	21135760000	0.000343888	0.000256245
						5.97833e+06	27929152000	0.000214054
						6.68633e+06	28272584000	0.000236495
						7.46533e+06	28196870000	0.000264758
						7.46533e+06	28948308000	0.000257885
						7.41933e+06	33664752000	0.000220389
					Frameshift +1 (+A)	4.55183e+07	29576646000	0.001539	0.00167193
						5.67653e+07	27053226000	0.00209828
						4.50803e+07	30391528000	0.00148332
						5.47833e+07	29914924000	0.0018313
						4.42283e+07	31757888000	0.00139267
						5.64413e+07	33456556000	0.001687
					Frameshift -1 (region)	1.71243e+07	35655180000	0.000480276	0.000744066
						1.84503e+07	23047584000	0.000800532
						1.67263e+07	22915882000	0.000729901
						1.86953e+07	21581990000	0.000866247
						1.82133e+07	22443954000	0.000811503
						1.93363e+07	24919904000	0.000775939
					Positive control	1.06306e+09	4460714000	0.238317	0.187552
						1.1287e+09	5865467000	0.192431
						1.64893e+09	9515081000	0.173297
						1.46159e+09	8093129000	0.180596
						1.42408e+09	9300267000	0.153122

## Sheet: Table S2-source data for Fig S6
	Blanks without plasmid					Measurements (with blank subtracted)
Strain grown at 20ºC	Firefly luciferase	Renilla luciferase		Strain	Plasmid	Firefly luciferase	Renilla luciferase	Fluc/Rluc	Average
MG1655 strain	13	73		MG1655 strain	Negative control	263	2030797	0.000129506	0.000149523
	1	1				376	2284830	0.000164564
	1	1				410	3150911	0.000130121
	1	1				415	2233353	0.000185819
	1	1				365	3378462	0.000108037
	1	1				519	2897955	0.000179092
Average	3	13			Frameshift -1 (ΔA)	1061	9142586	0.00011605	0.000150658
ΔCLMNuE strain	0	1				1426	9326400	0.000152899
	1	1				1477	11870198	0.000124429
	1	1				1921	14188830	0.000135388
	1	1				1858	10005736	0.000185693
	1	1				1518	8011168	0.000189485
	1	1			Frameshift +1 (+G)	13165	9619910	0.00136852	0.00123201
Average	0.833333	1				13669	12166704	0.00112348
						14689	13410705	0.00109532
						14783	11246787	0.00131442
						16410	12983634	0.0012639
						13884	11320557	0.00122644
					Frameshift -1 (ΔG)	2037	18877023	0.000107909	0.000152665
						1689	6990203	0.000241624
						1340	9384224	0.000142793
						1460	10118942	0.000144284
						1471	10915048	0.000134768
						1621	11209428	0.00014461
					Frameshift +1 (+A)	11109	8304600	0.00133769	0.00116024
						11064	10192187	0.00108554
						12196	10889131	0.00112002
						11361	8689268	0.00130747
						11174	10799269	0.0010347
						15224	14148682	0.001076
					Frameshift -1 (region)	6554	10999374	0.000595852	0.000527149
						6800	14107417	0.000482016
						4848	10791995	0.000449222
						5479	10672854	0.000513358
						8402	17730759	0.000473866
						4615	7115541	0.00064858
					Positive control	449026	6316001	0.0710934	0.0693364
						444677	7016859	0.0633727
						637461	9940589	0.0641271
						409994	5609499	0.0730892
						551576	8102441	0.0680753
						422717	5543032	0.076261
				ΔCLMNuE strain	Negative control	206.167	807338	0.000255366	0.000263386
						342.167	1199799	0.000285187
						334.167	1311024	0.00025489
						379.167	1474485	0.000257152
						342.167	1701898	0.00020105
						376.167	1151511	0.000326672
					Frameshift -1 (ΔA)	1477.17	9722533	0.000151932	0.000204569
						2913.17	15428786	0.000188814
						2271.17	9434393	0.000240733
						2523.17	12851284	0.000196336
						2031.17	8841363	0.000229735
						1861.17	8465084	0.000219864
					Frameshift +1 (+G)	11738.2	10937479	0.00107321	0.00133703
						14826.2	9820403	0.00150973
						9941.17	8048365	0.00123518
						15138.2	11048969	0.0013701
						11824.2	7860097	0.00150433
						14186.2	10669143	0.00132964
					Frameshift -1 (ΔG)	2091.17	10531756	0.000198558	0.000201759
						3398.17	18736345	0.000181368
						2288.17	9647331	0.000237181
						1754.17	9509264	0.000184469
						1321.17	5834142	0.000226454
						1779.17	9747765	0.00018252
					Frameshift +1 (+A)	19236.2	13816787	0.00139223	0.00152004
						28936.2	15683287	0.00184503
						15079.2	10202169	0.00147804
						17552.2	12890172	0.00136167
						21124.2	13469910	0.00156825
						11430.2	7749265	0.001475
					Frameshift -1 (region)	6317.17	9884700	0.000639085	0.000561363
						4354.17	8820438	0.000493645
						5334.17	14737354	0.000361949
						8939.17	12892688	0.000693352
						5540.17	9480884	0.000584351
						8352.17	14018494	0.000595796
					Positive control	395780	4388379	0.0901882	0.0937668
						336328	3653767	0.0920497
						511049	5338401	0.0957308
						443330	4614143	0.0960807
						384050	4142045	0.0927199
						402921	4204474	0.0958315
